# Supplementary material for: Development of enzyme–inorganic hybrid nanoflower-modified electrodes and a smartphone-controlled electrochemical analyzer for point-of-care testing of salivary amylase in saliva
Source: Royal Society of Chemistry journal article supplement (doi:10.1039/d3nr04388f), 2023-11-21
Supplement: d3nr04388f1.pdf [file d3nr04388f1.pdf]

## Supporting Information

### **Development of enzyme-inorganic hybrid nanoflower-modified electrodes and a smartphone-controlled electrochemical analyzer for point-of-care testing of salivary amylase in saliva**

Cong Liu<sup>a</sup>, Xia Gong<sup>a</sup>, Xiao Yang<sup>b</sup>, Zipei Yu<sup>a</sup>, Weihao Li<sup>b</sup>, Guangyi Liao<sup>b</sup>,

Chuanquan Lin<sup>b\*</sup>, Lelun Jiang<sup>a\*</sup>, and Changqing Yi<sup>a\*</sup>

<sup>a</sup> Guangdong Provincial Engineering and Technology Center of Advanced and Portable Medical Devices, School of Biomedical Engineering, Sun Yat-Sen University, Guangzhou, 510275, PR China

<sup>b</sup> Science and Technology Innovation Center, Guangzhou University of Chinese Medicine, Guangzhou, 510405, PR China

*Correspondence: Email: [chuanquanlin@gzucm.edu.cn](mailto:chuanquanlin@gzucm.edu.cn); [jianglel@mail.sysu.edu.cn](mailto:jianglel@mail.sysu.edu.cn); [yichq@mail.sysu.edu.cn](mailto:yichq@mail.sysu.edu.cn).*

## Contents

|                                |    |
|--------------------------------|----|
| 1. Supplementary Figures. .... | S2 |
| 2. Supplementary Tables .....  | S6 |
| 3. References .....            | S9 |

## 1. Supplementary Figures

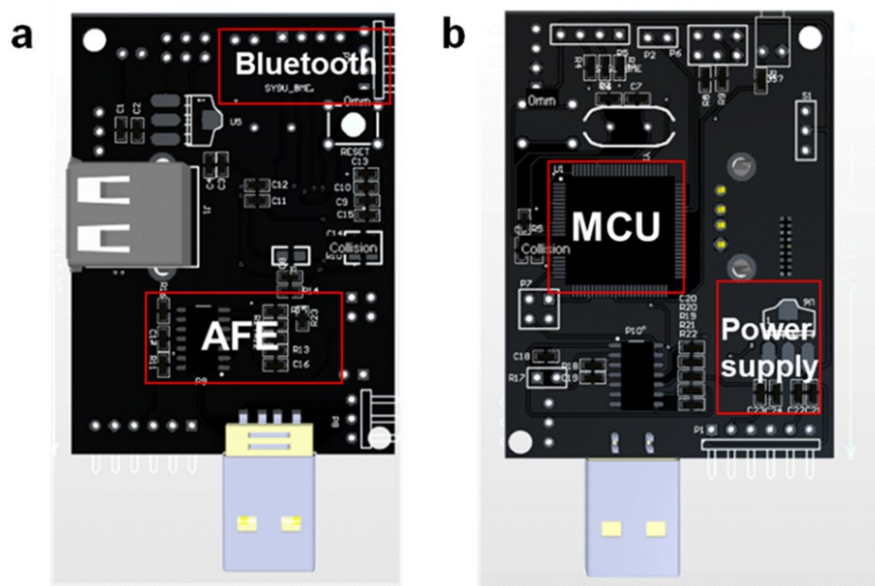

**Fig. S1.** System schematic diagram of the smartphone-controlled electrochemical analyzer.

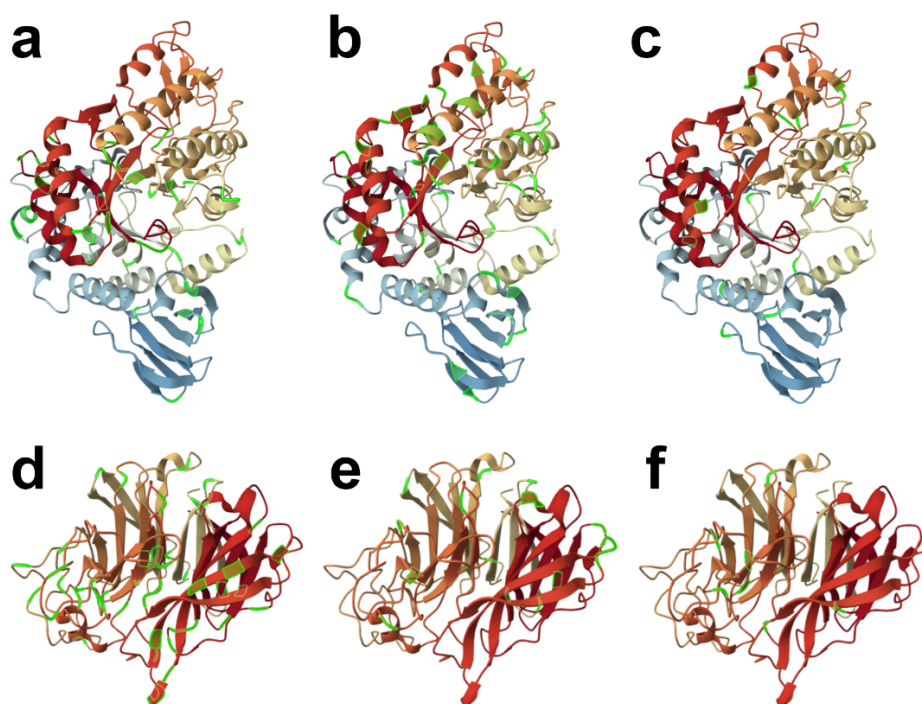

**Fig. S2.** Crystal structure of  $\alpha$ -glucosidase (a-c) (Image copied from PDB DOI: <https://doi.org/10.2210/pdb3WY2/pdb>, amide group: total 626, dissociated 89; histidine:15)<sup>12</sup> and glucose dehydrogenase (d-f) (Image copied from PDB DOI: <https://doi.org/10.2210/pdb7CDY/pdb>, amide group: total 416, dissociated 62; histidine: 7). Residues highlighted in bright green: Glycine (a, d), Asparagine (b, e), and Histidine (c, f).

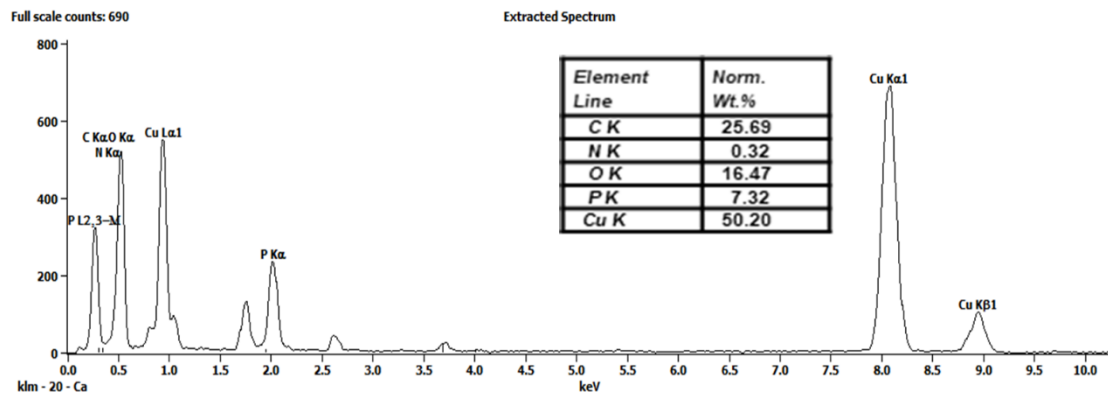

Fig. S3. The EDX characterization results of the NFs.

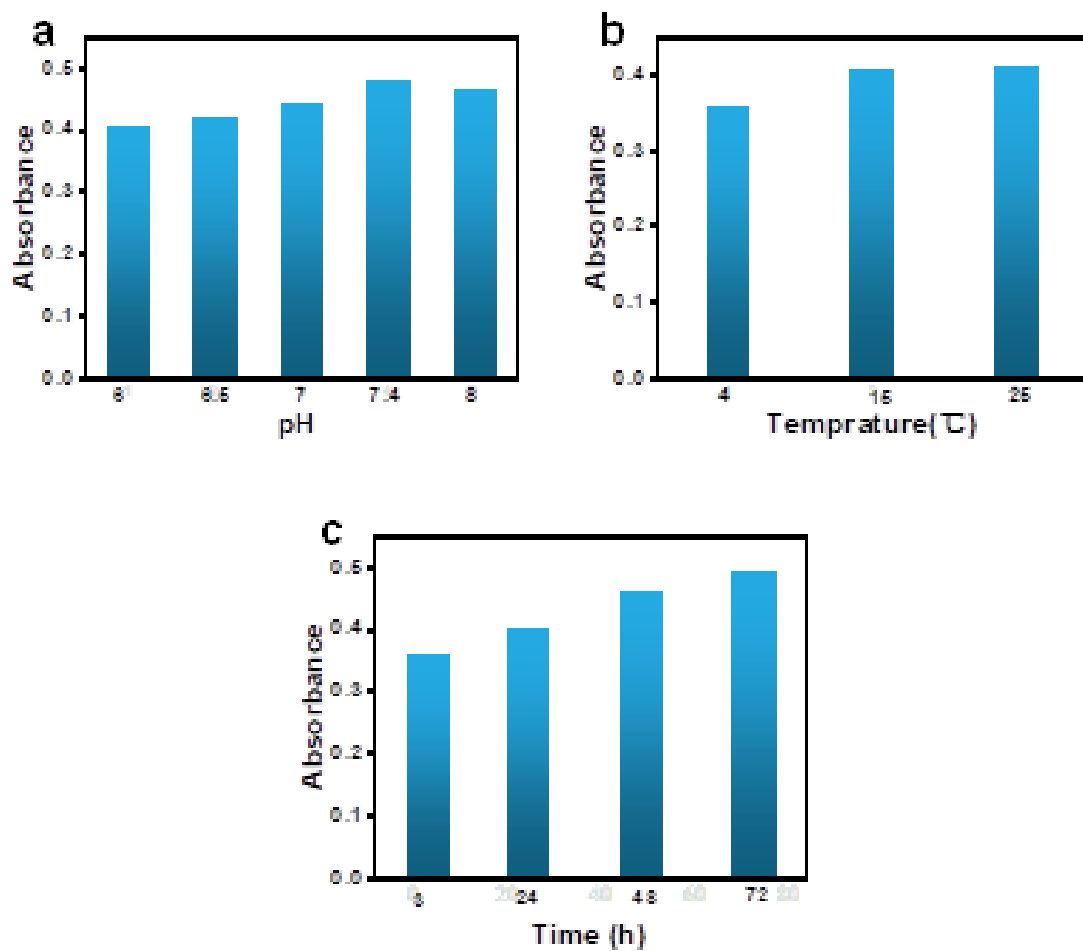

Fig. S4. NF synthesis optimization using activity of enzymes loaded on the NFs as the critical parameter. (a) pH; (b) temperature; (c) Time.

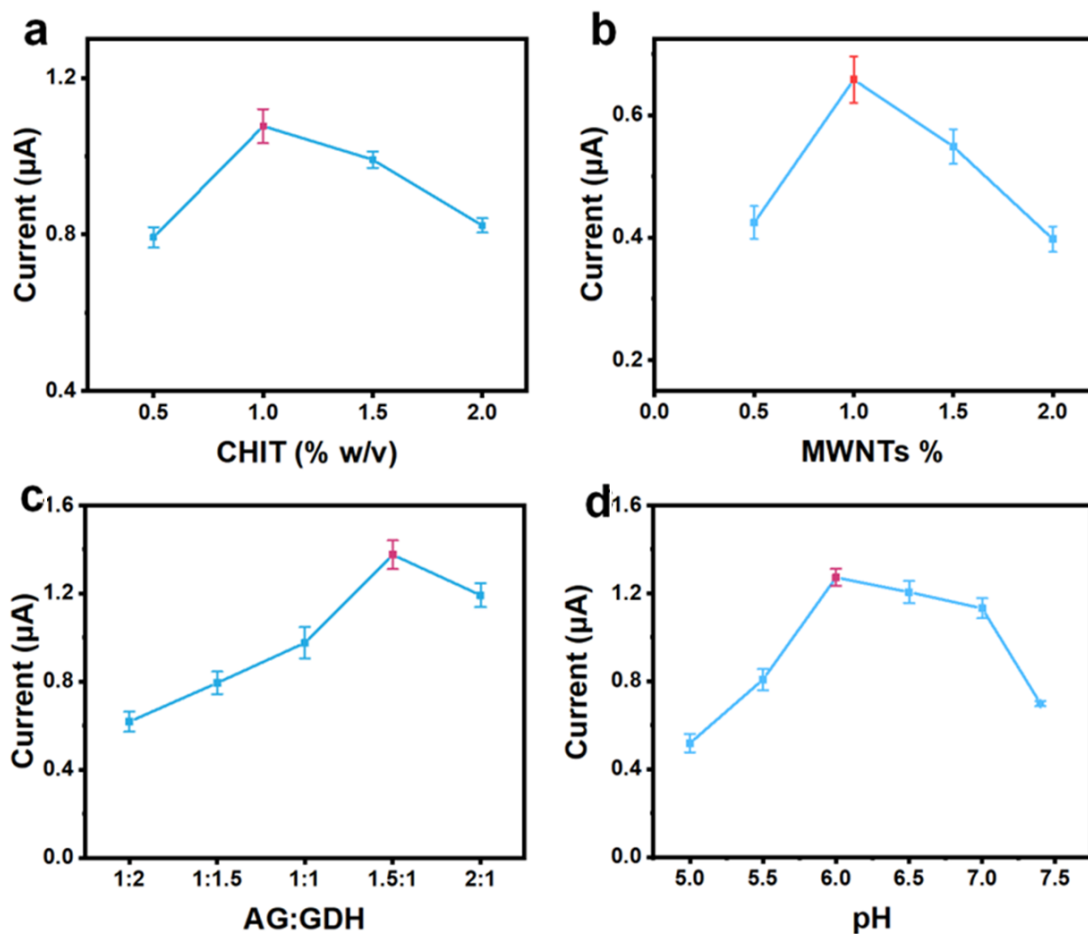

**Fig. S5. Optimization for maltose sensing assay.** (a) Current response of the NFs/CHIT-MWNTs /SPCE with different CHIT concentrations in acetate buffer (pH 6.0) containing 1.0 mM NAD<sup>+</sup> and 5.0 mM maltose; (b) Current response of the NFs/CHIT-MWNTs/SPCE with different MWNT concentrations in acetate buffer (pH 6.0) containing 1.0 mM NAD<sup>+</sup> and 5.0 mM maltose; (c) Current response of the NFs/CHIT-MWNTs/SPCE in acetate buffer (pH 5.0-6.5) and phosphate buffer (pH 7.0 -7.5) containing 1.0 mM NAD<sup>+</sup> and 5.0 mM maltose; (d) Current response of the NFs/CHIT-MWNTs/SPCE with different AG/GDH ratios in acetate buffer (pH 6.0) containing 1.0 mM NAD<sup>+</sup> and 5.0 mM maltose

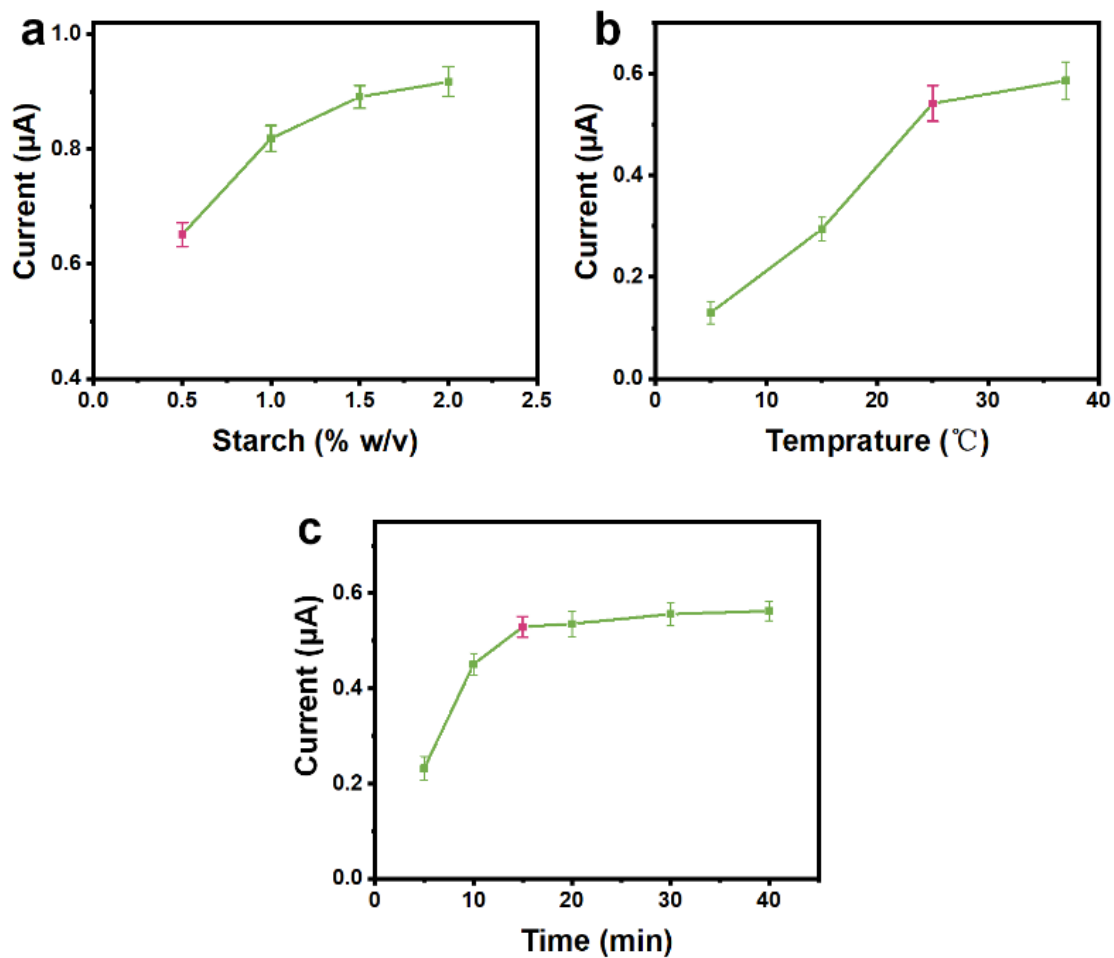

**Fig. S6. Optimization for sAA sensing assay.** (a) Current response of the NFs/CHIT-MWNTs/SPCE in the solution containing 600 U/mL sAA in the presence of different concentrations of starch at room temperature; (b) Current response of the NFs/CHIT-MWNTs/SPCE in the solution containing 600 U/mL sAA and 0.5% starch at different incubation temperatures; (c) Current response of the NFs/CHIT-MWNTs/SPCE *versus* time in the presence of 600 U/mL sAA and 0.5% starch at room temperatures.

## 2. Supplementary Tables

**Table S1.** Comparison of different methods for sAA quantitation.

| Sensor              | Method               | Linear range(U/mL) | LOD (U/mL) | Assay time (min) | Samples type      | POCT | Ref       |
|---------------------|----------------------|--------------------|------------|------------------|-------------------|------|-----------|
| Paper-based strip   | colorimetry          | 20–500             | 8          | 20               | Saliva            | N    | [1]       |
| Colour reader       | colorimetry          | 10–230             | /          | 1                | Saliva            | N    | [2]       |
| paper-sensor        | colorimetry          | 0.01-0.11          | /          | 37               | Serum             | N    | [3]       |
| Immunosensor        | QCM                  | 3.09 -47.08        | 0.077      | /                | Saliva            | N    | [4]       |
|                     | Impedance            |                    |            |                  |                   |      |           |
| Hydrogel films      | spectroscopy and QCM | 0.08-8             | 0.008      | 20               | /                 | N    | [5]       |
| SPCE                | Amperometry          | 100-1200           | 1.1        | 20               | Saliva            | N    | [6]       |
| SPE                 | Potentiometry        | 200-800            | 0.12       | 5                | Saliva            | Y    | [7]       |
| CuO/Cu              | Amperometry          | /                  | 0.05       | 1                | Saliva            | N    | [8]       |
| Test-strip          | Glucometer           | 200-1000           | 20         | 37               | Serum<br>Urine    | Y    | [9]       |
| Modified SPE        | Amperometry          | 5-250              | 5          | 10               | Artificial Saliva | N    | [10]      |
| GOD/AG/SPE          | Amperometry          | 60-840             | 17         | 30               | Saliva            | N    | [11]      |
| NFs/CHIT-MWNTs/SPCE | Amperometry          | 100-2000           | 5.02       | 20               | Saliva            | Y    | This Work |

**Table S2.** Quantitation of sAA activity in clinical saliva samples.

| Sample | Methods          |                       |                    |
|--------|------------------|-----------------------|--------------------|
|        | This Work(U/mL)  | Bernfeld method(U/mL) | Deviation rate (%) |
| 1      | 11452.82±978.417 | 10619.06              | 7.851537           |
| 2      | 9767.802±198.957 | 9967.7545             | -2.00599           |
| 3      | 5119.211±235.387 | 5291.9604             | -3.26436           |
| 4      | 9217.277±203.231 | 9910.6104             | 3.465001           |
| 5      | 9217.277±240.533 | 9148.5499             | 0.751237           |
| 6      | 4692.169±180.078 | 4519.3779             | 3.823343           |
| 7      | 5548.827±32.157  | 5531.076              | 0.320931           |
| 8      | 8985.748±324.172 | 8980.5425             | 0.057966           |
| 9      | 3158.932±142.478 | 2986.5766             | 5.770996           |
| 10     | 3526.806±247.623 | 3633.9238             | -2.94772           |
| 11     | 7918.142±187.796 | 7386.5947             | 7.196101           |
| 12     | 8872.556±102.902 | 8357.4915             | 6.162908           |
| 13     | 4362.883±276.549 | 3760.5392             | 16.01749           |



**Table S3.** BMI, HbA1c level and sAA activity of 20 obese volunteers.

| <b>Samples</b> | <b>Gender</b> | <b>BMI</b> | <b>[HbA1c]%</b> | <b>[sAA] U/mL</b> |
|----------------|---------------|------------|-----------------|-------------------|
| 1              | M             | 35.00      | 9.90            | 5522.84±218.81    |
| 2              | M             | 29.90      | 11.50           | 2787.38±252.65    |
| 3              | M             | 41.00      | 6.30            | 801.42±516.39     |
| 4              | F             | 35.70      | 6.20            | 714.06±142.34     |
| 5              | M             | 34.40      | 4.70            | 1296.55±90.99     |
| 6              | F             | 26.60      | 4.66            | 1554.38±112.14    |
| 7              | M             | 37.90      | 6.00            | 1106.30±217.20    |
| 8              | M             | 35.00      | 6.60            | 1011.40±283.91    |
| 9              | M             | 27.80      | 7.70            | 3934.22±139.79    |
| 10             | M             | 33.90      | 11.70           | 1264.32±287.20    |
| 11             | F             | 32.00      | 7.20            | 2438.71±234.09    |
| 12             | M             | 37.00      | 5.60            | 2354.34±179.99    |
| 13             | M             | 38.70      | 6.80            | 1693.54±152.20    |
| 14             | M             | 29.50      | 8.20            | 3903.59±234.09    |
| 15             | M             | 31.80      | 12.80           | 7343.84±372.80    |
| 16             | M             | 34.90      | 14.80           | 7791.56±257.80    |
| 17             | M             | /          | 6.80            | 1525.53±260.84    |
| 18             | M             | 25.60      | 25.60           | 6612.02±149.18    |
| 19             | M             | 36.80      | 5.80            | 1456.22±97.62     |
| 20             | F             | 26.60      | 5.10            | 1754.78±219.97    |

### 3. References

- [1] I. Tsyrlneva, P. Alagappan, B. Liedberg, et al., *ACS Sens.* 4(2019) 865-873.
- [2] V. Shetty, C. Zigler, T.F. Robles, et al., *Psychoneuroendocrinology*, 36(2011) 193-199.
- [3] S. Dutta, N. Mandal, D. Bandyopadhyay, *Biosens. Bioelectron.* 78(2016) 447-453.
- [4] B. Della Ventura, N. Sakač, R. Funari, et al., *Talanta* 174(2017) 52-58.
- [5] M.J. Gibbs, A. Biela, S. Krause, et al., *Biosens. Bioelectron.* 67(2015) 540-545.
- [6] P.T. Garcia, L.N. Guimarães, A.A. Dias, et al., *Sens. Actuators B Chem.* 258(2018) 342-348
- [7] M. Zhang, Y. Zhang, C. Yang, et al., *Talanta* 224(2021) 121840.
- [8] P.T., Garcia, A.A. Dias, J.A. Souza, et al., *Anal. Chim. Acta*, 1041(2018) 50-57.
- [9] Q. Wang, H. Wang, X. Yang et al., *Analyst* 140(2015) 1161-1165.
- [10] M. Mahosenaho, F. Caprio, L. Micheli, et al., *Microchimica Acta*, 170(2010) 243-249
- [11] L. Zajoncová, M. Jílek, V. Beranová, et al., *Biosens. Bioelectron.* 20(2004) 240-245.
- [12] X. Shen, W. Saburi, Z. Gai, et al., *Acta Crystallogr. D Biol. Crystallogr.* 71(2015) 1382-1391.
